# Supplementary material for: Transfer hydrogenation of ketone; an in situ approach toward an eco-friendly reduction
Source: Royal Society of Chemistry journal article supplement (doi:10.1039/d2ra02701a), 2022-01-01
Supplement: d2ra02701a1.pdf [file d2ra02701a1.pdf]

Transfer Hydrogenation of Ketone; An *In-situ* Approach toward an Eco-friendly Reduction

**Oluwatayo Racheal Onisuru, Dele Peter Fapojuwo, Charles O. Osaghale, Oyekunle Azeez Alimi, and Reinout Meijboom**

Department of Chemical Sciences, University of Johannesburg, P.O. Box 524, Auckland Park,  
Johannesburg 2006, South Africa.

Tel. +27 (0)728940293, Fax: +27 (0)11 559 2819

Corresponding Author\* E-mail: rmeijboom@uj.ac.za (R.M.)

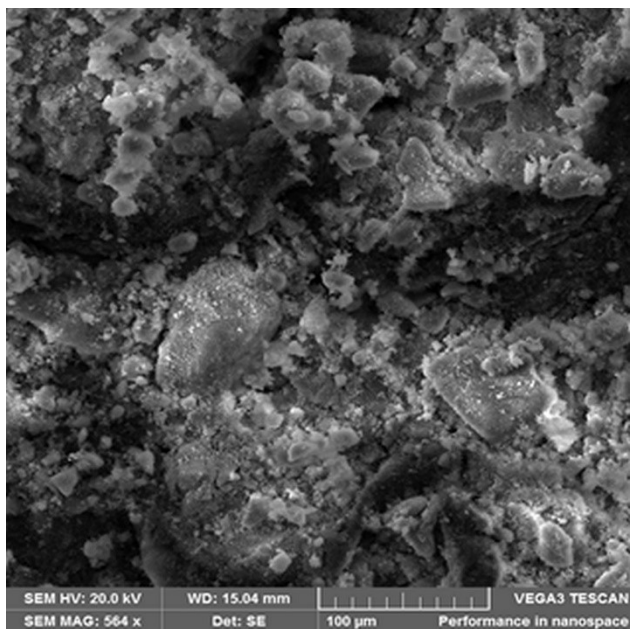

**Fig. S1.** Image of SEM obtained for Pd@SiO<sub>2</sub>

$$\text{Conversion (\%)} = \frac{(\text{Substrate}_0 - \text{Substrate}_t) \times 100}{\text{Substrate}_0} \quad (1)$$

$$\text{Selectivity (\%)} = \left( \frac{\text{moles of product}}{\text{moles of substrate}_0} \right) \times 100 \quad (2)$$

Substrate<sub>0</sub> represents the initial mole of the substrate, and substrate<sub>t</sub> is the present mole of the substrate at the time t.

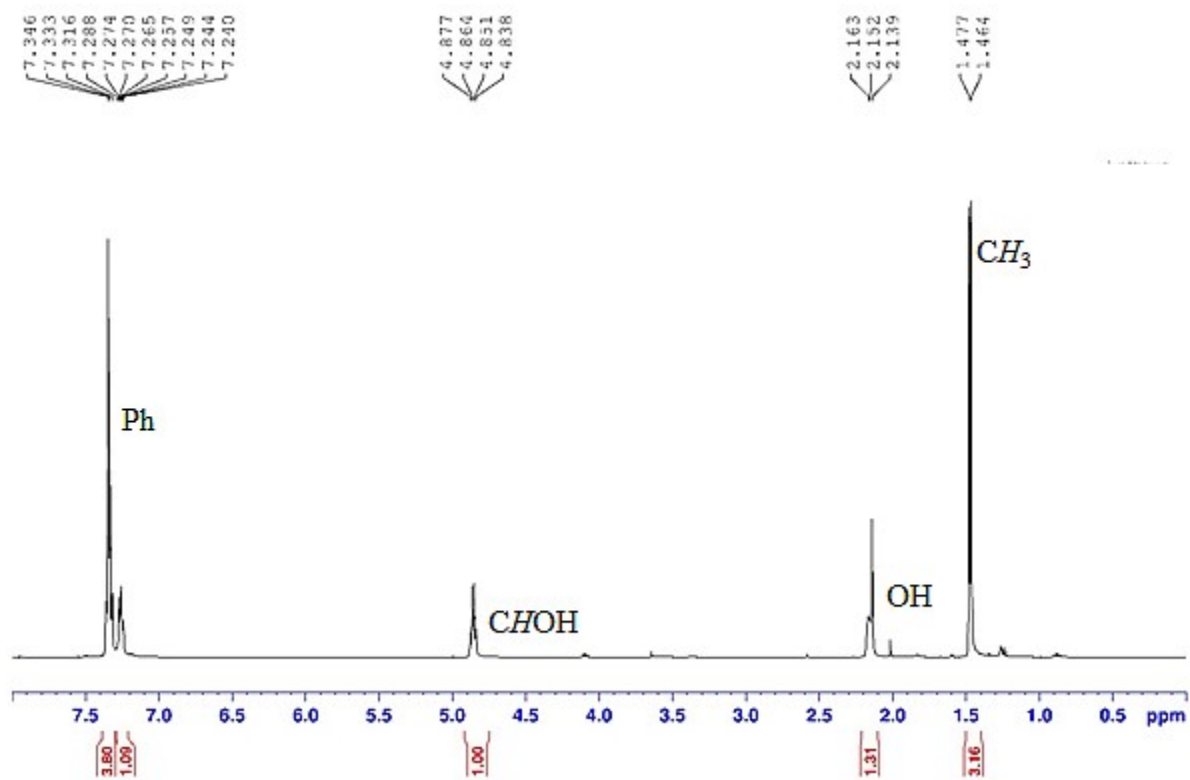

Fig. S2a. <sup>1</sup>H NMR Spectrum of the produced 1-Phenyl ethanol using Pd@SiO<sub>2</sub>.

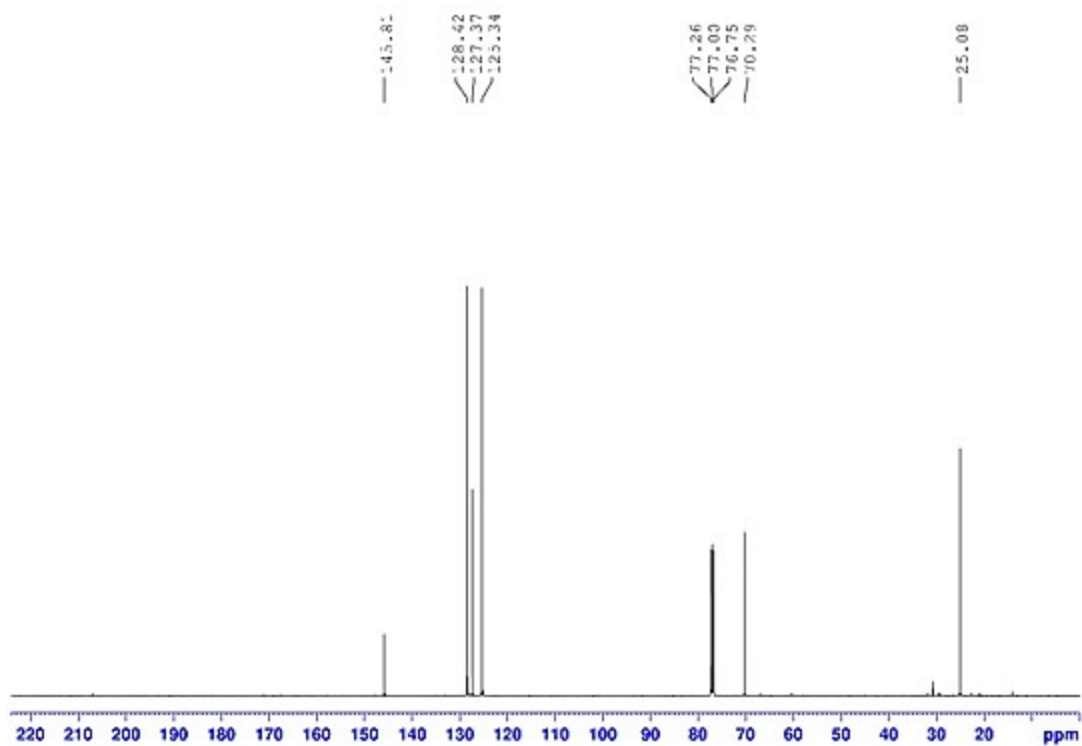

**Fig. S2b.**  $^{13}\text{C}$  NMR Spectrum of the produced 1-Phenyl ethanol using Pd@SiO<sub>2</sub>.

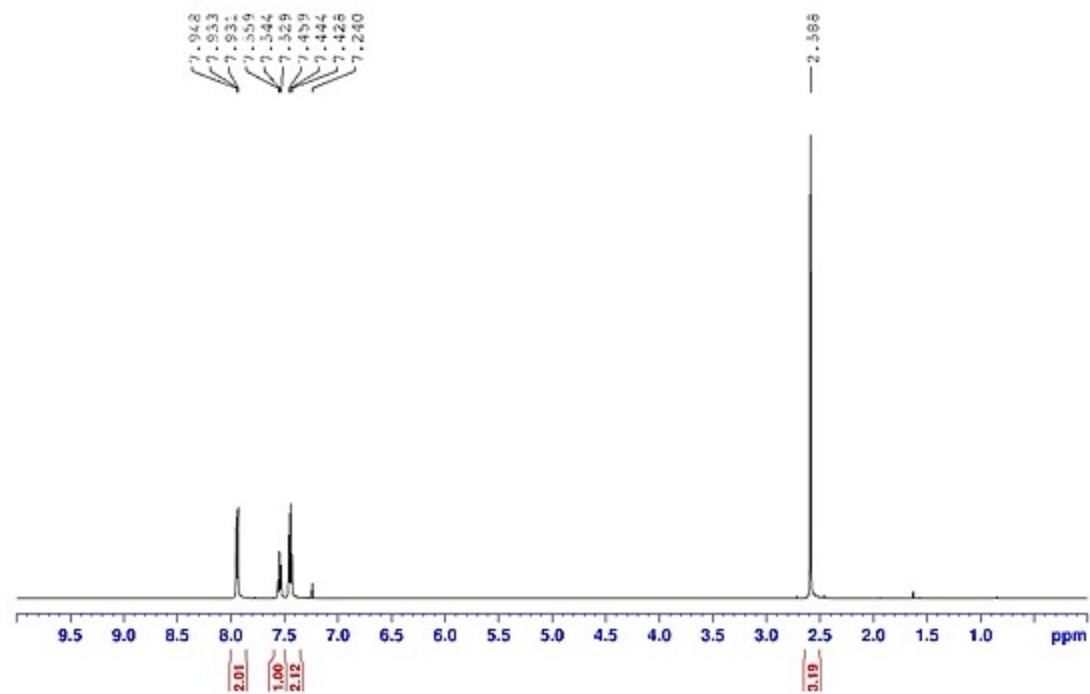

**Fig. S2c.**  $^1\text{H}$  NMR Spectrum of the produced 1-Phenyl ethanol using Pd@SiO<sub>2</sub>.

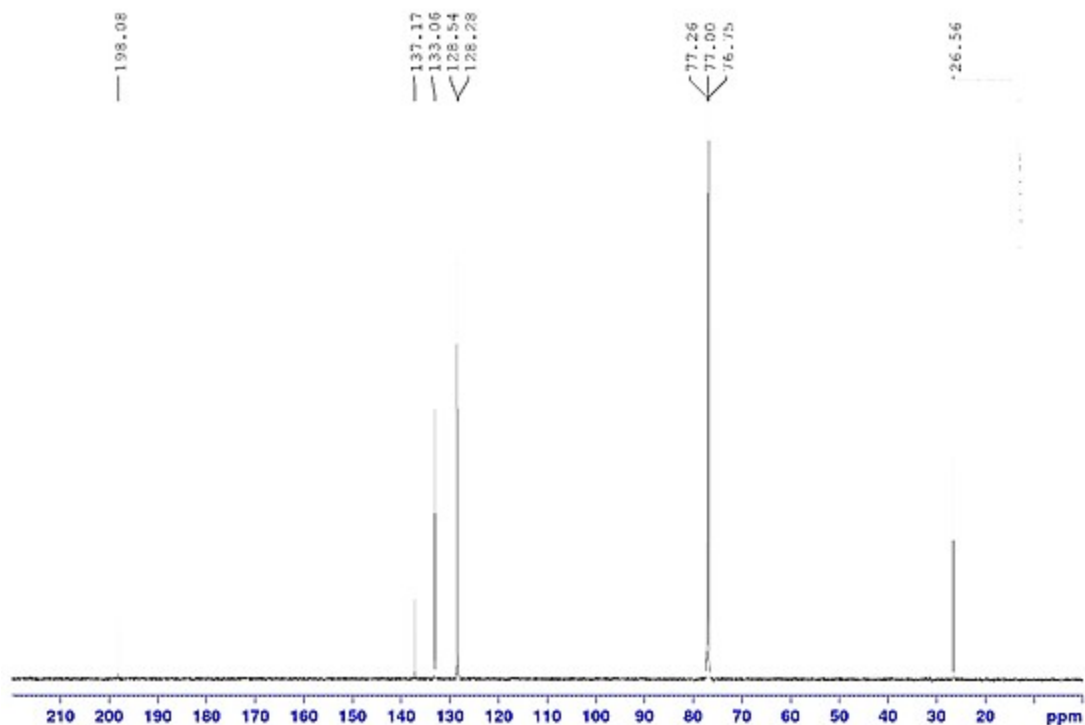

**Fig. S2d.**  $^{13}\text{C}$  NMR Spectrum of the produced 1-Phenyl ethanol using Pd@SiO<sub>2</sub>.

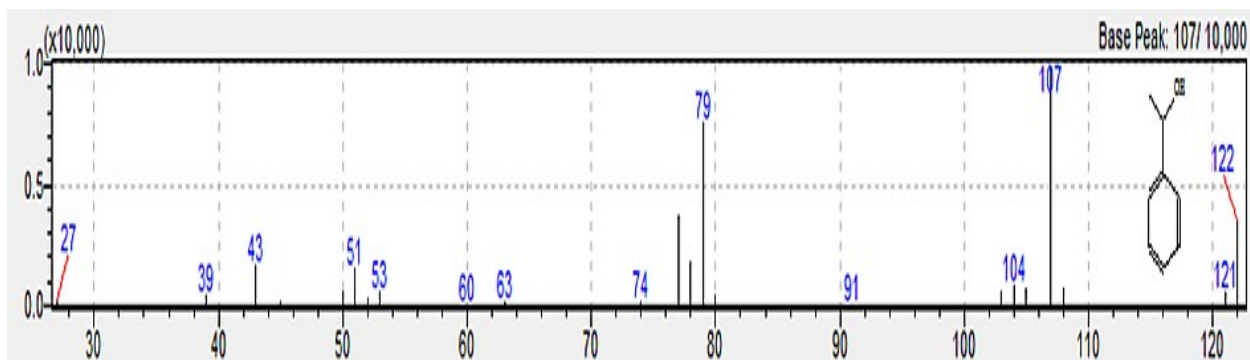

**Fig. S3.** Product chromatogram of the GC-MS analysis obtained for the hydrogenation of acetophenone at 80 °C after 30 min.

Generally from the literature ketone hydrogenation leads to the formation of one product.<sup>1-6</sup> Therefore, the extraction process on our product to remove all possible solvents was carried out using BUCHI rotavapor R-100 after the filtration of the organic layer. Product separation was done with ethyl acetate of which the organic layer was passed through a column of MgSO<sub>4</sub> dried.

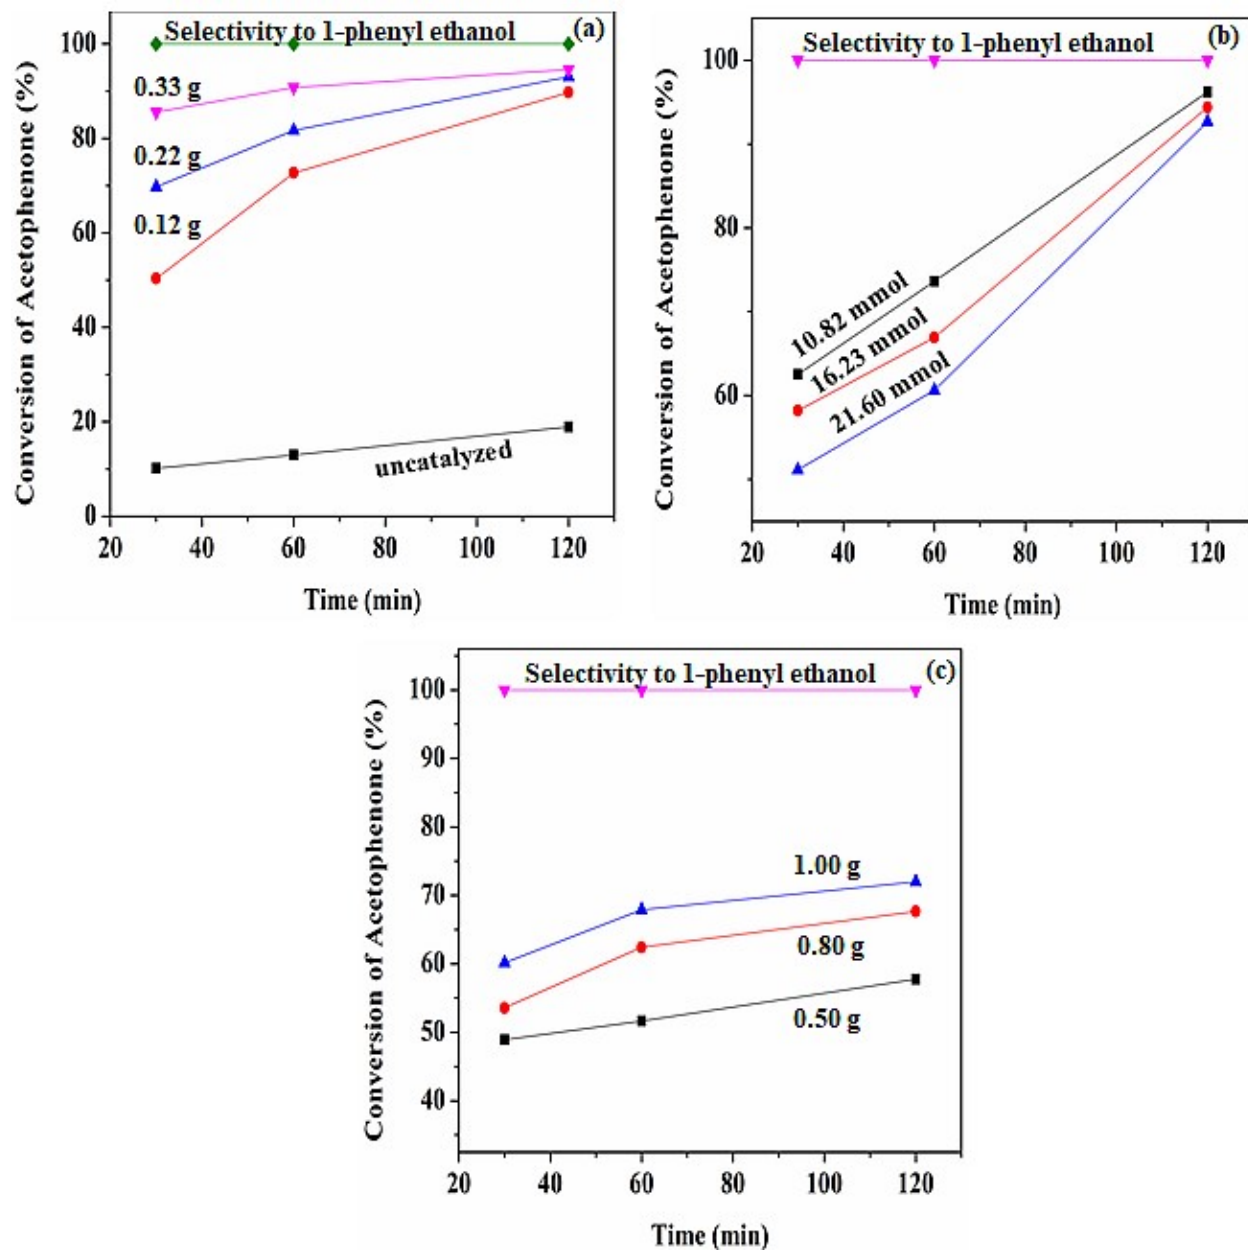

**Fig. S4.** Different plots revealing the variations at 60 °C of (a) catalyst amount variation, (b) substrate variation, (c) Borohydride variation obtained.

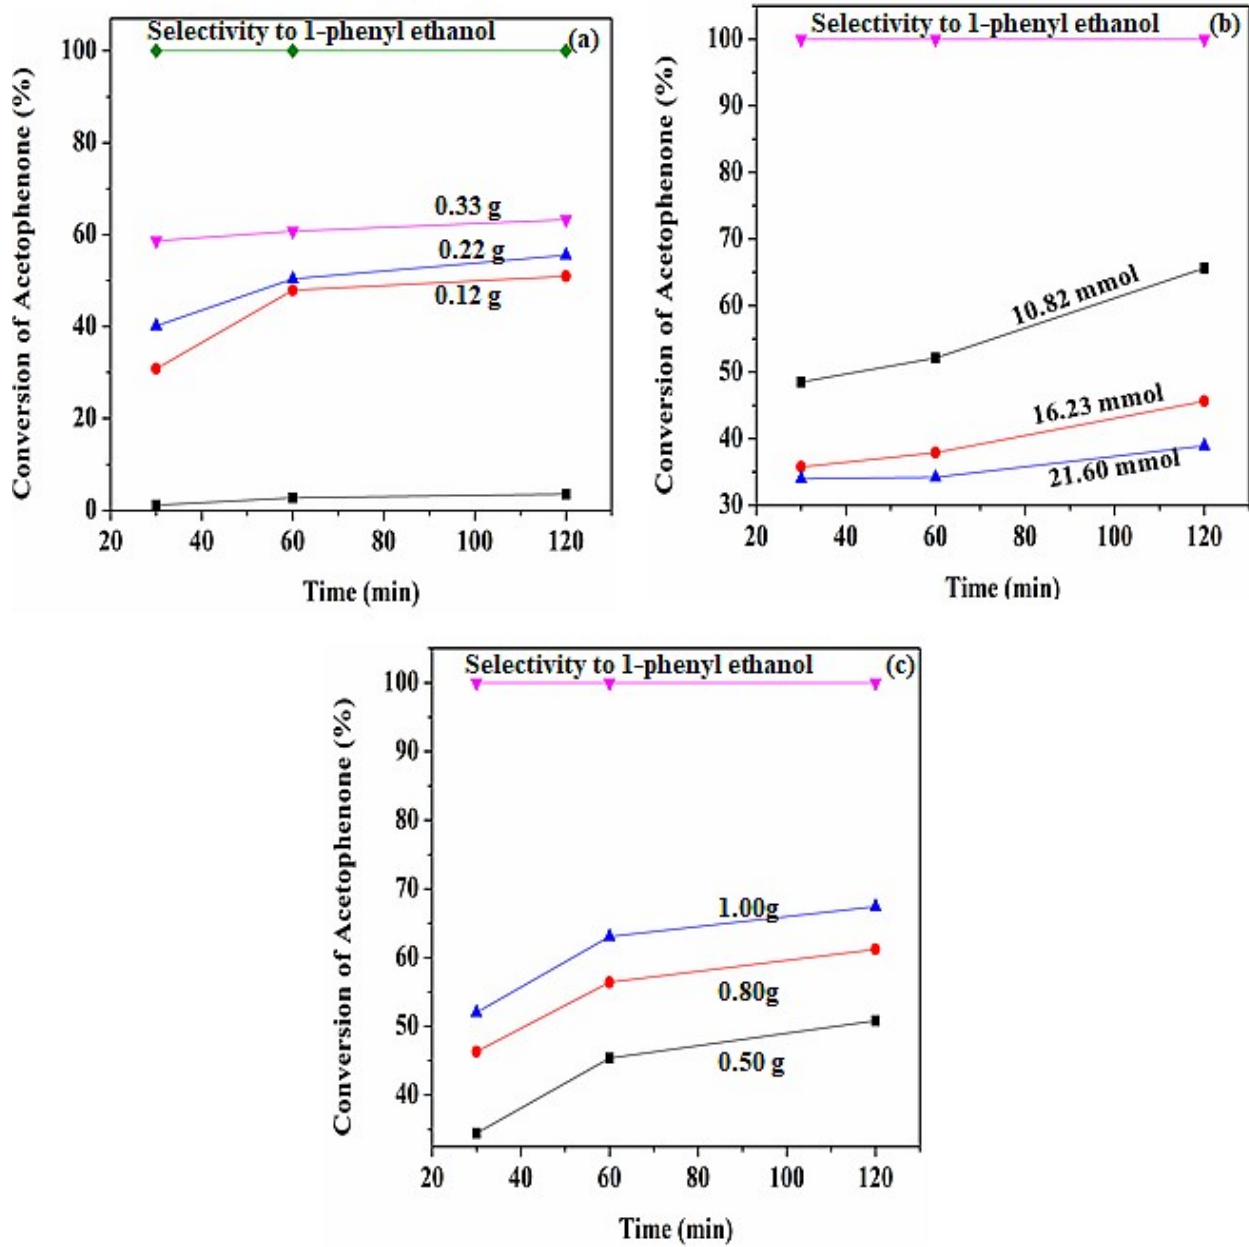

**Fig. S5.** Different plots revealing the variations at 30 °C of (a) catalyst amount variation, (b) substrate variation, (c) Borohydride variation obtained.

Supplementary Table (ST) 1

Data obtained for the conversion of acetophenone at different temperatures using the same amount of catalyst and the substrate.

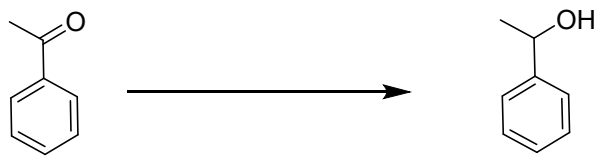

acetophenone  1-phenyl ethanol

| Temperature (°C) | Conversion (%) |             |              |
|------------------|----------------|-------------|--------------|
|                  | at 30 (min)    | at 60 (min) | at 120 (min) |
| 30               | 33.99          | 34.21       | 38.93        |
| 60               | 51.15          | 60.63       | 92.67        |
| 80               | 99.09          | 99.25       | 99.33        |

Condition: 21.60 mmol of the substrate, 1.00 g of  $\text{BH}_4^-$ , 0.22 g of  $\text{Pd@SiO}_2$ , 6.00 mL of HPMC solution decane (0.5 mmol), 80 °C.

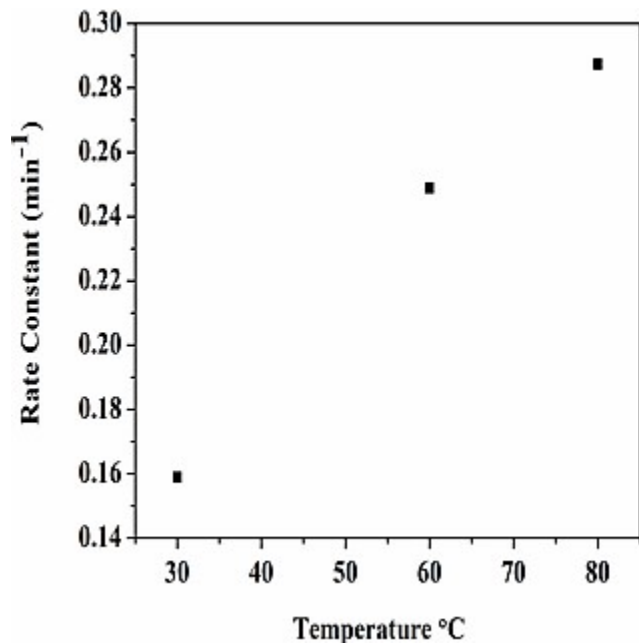

Fig. S6. Plot showing the dependence of the rate constant on the temperature.

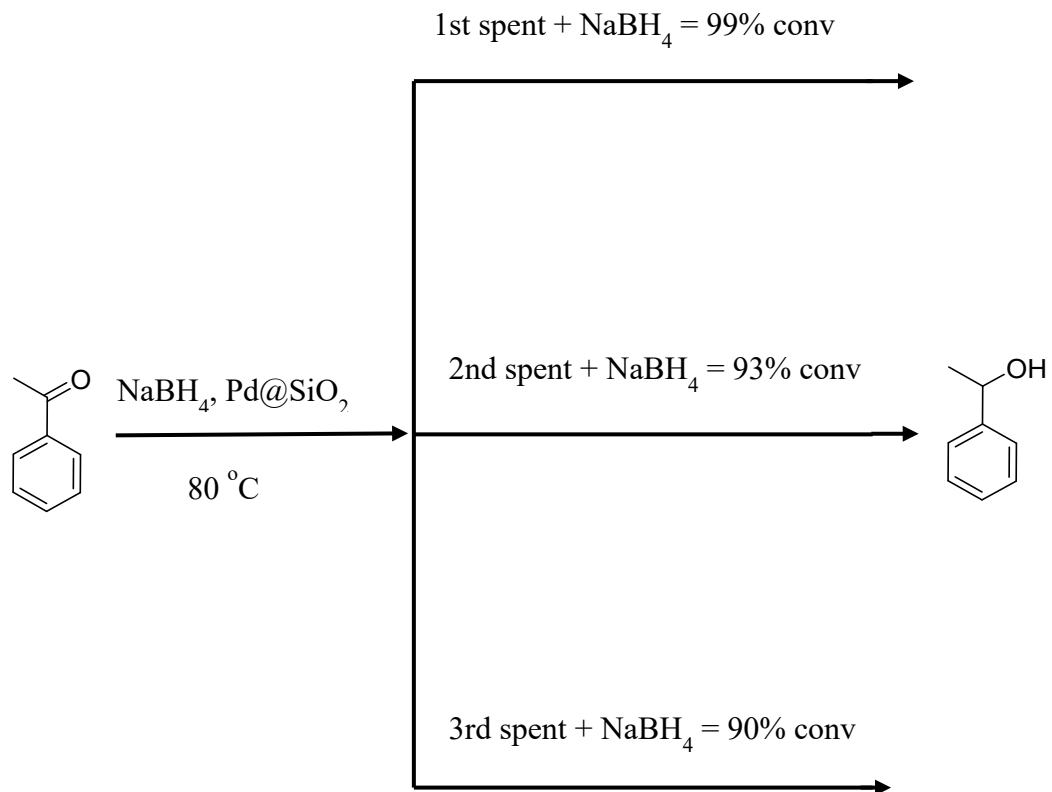

**SScheme 1.** Schematic representation of the recyclability of spent catalyst acetophenone conversion (conv) to 1-Phenyl ethanol (at 80 °C, 0.22 g catalyst, 21.60 mmol of acetophenone, 1.00 g BH<sub>4</sub><sup>-</sup> and 0.5 mmol decane).



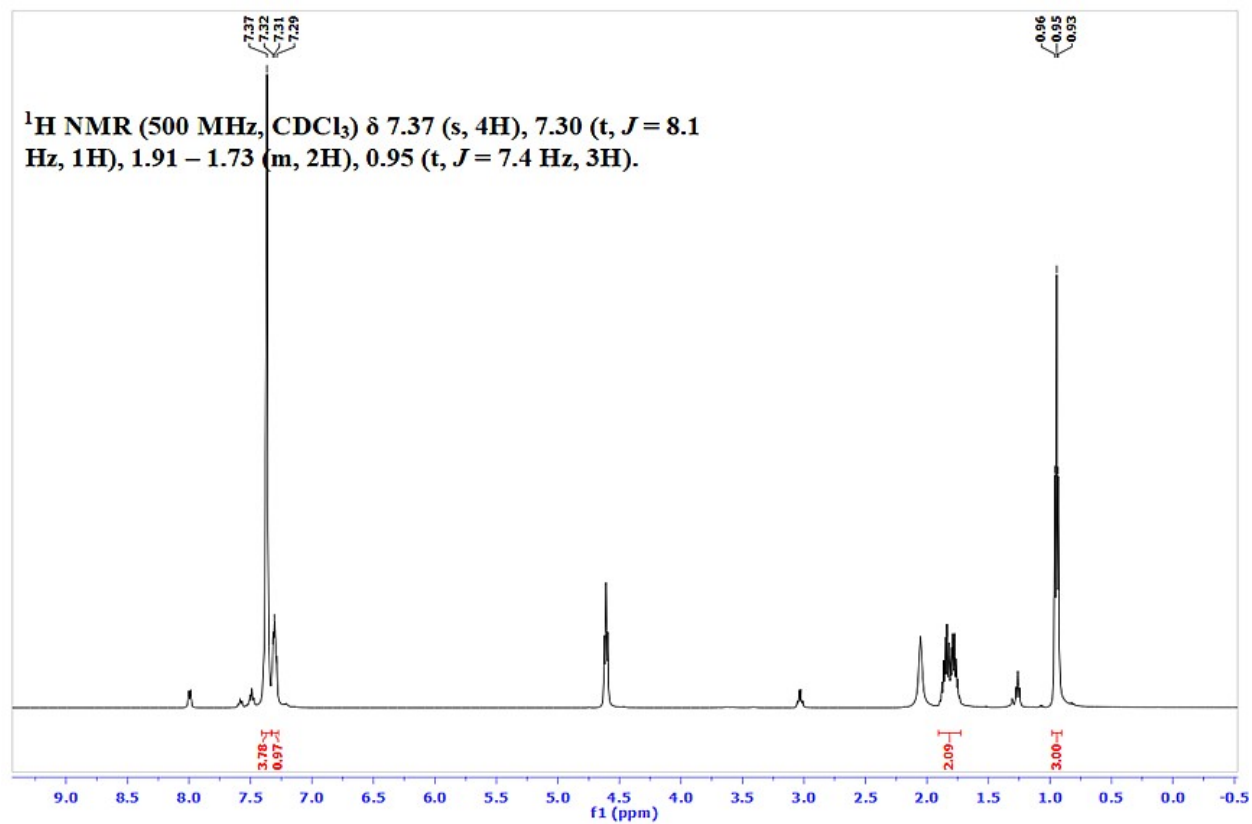

**Fig. S7a.**  $^1\text{H}$  NMR Spectrum of the generated benzene methanol using  $\text{Pd}@\text{SiO}_2$ .

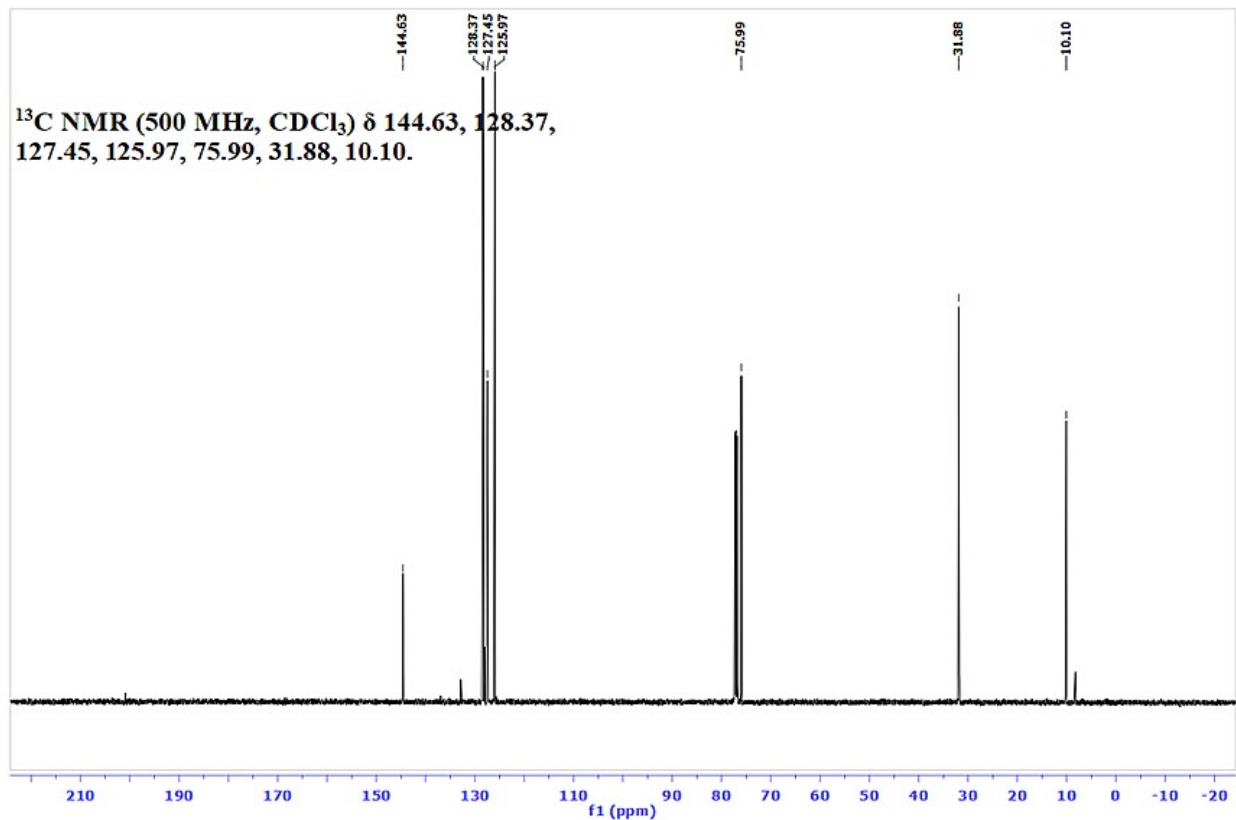

**Fig. S7b.**  $^{13}\text{C}$  NMR Spectrum of the generated benzene methanol using  $\text{Pd}@\text{SiO}_2$ .

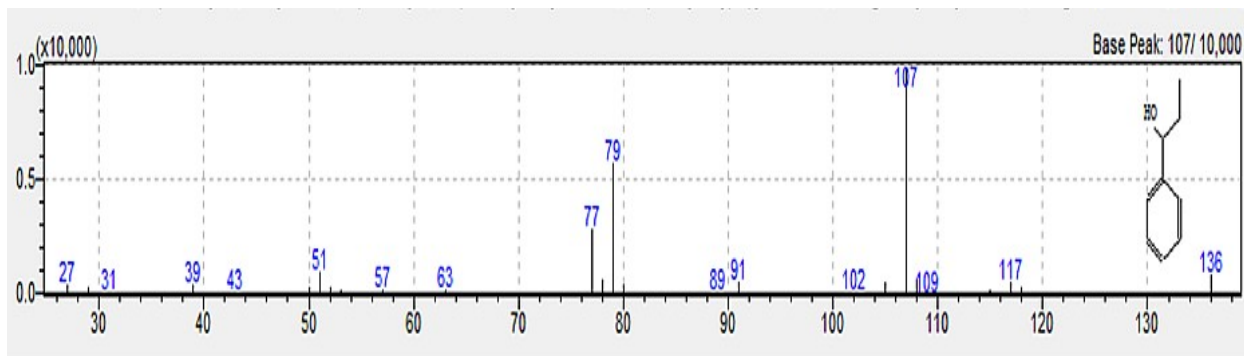

**Fig. S8.** Product chromatogram of the GC-MS analysis obtained for the hydrogenation of propiophenone at  $80\text{ }^\circ\text{C}$ .

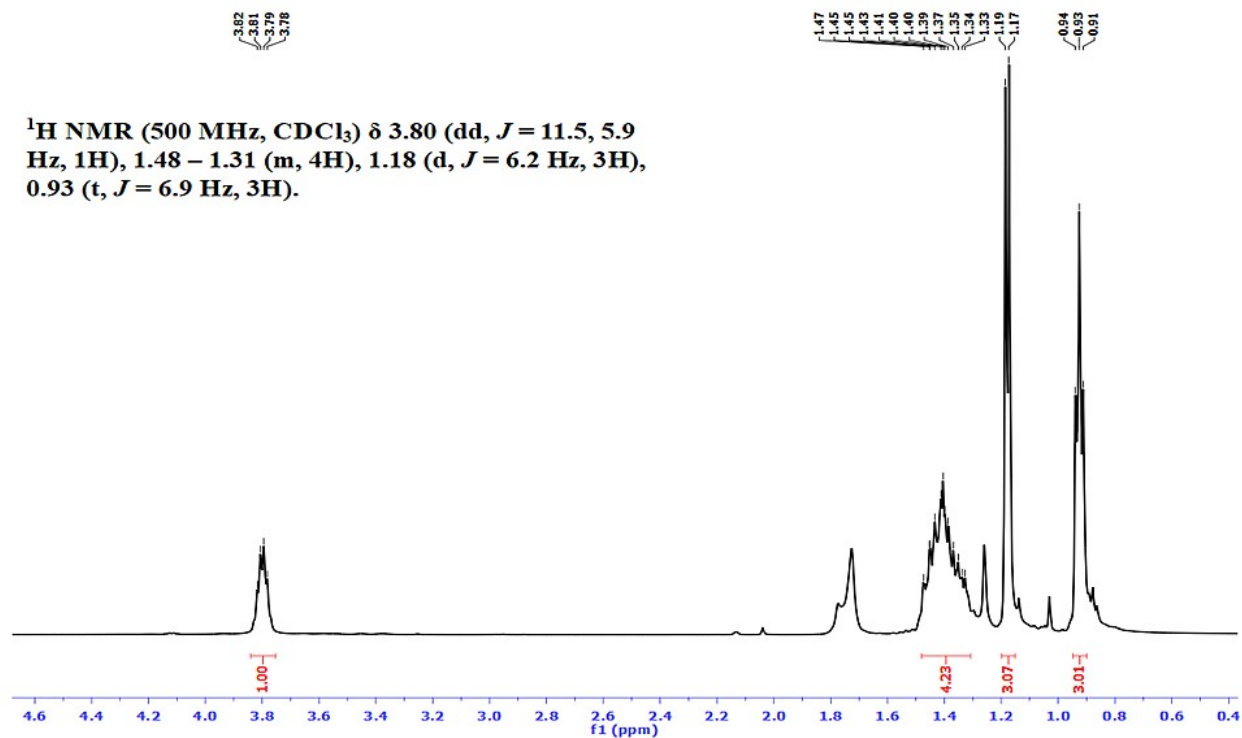

Fig. S9a. <sup>1</sup>H NMR Spectrum of the generated 2-Pentanol using Pd@SiO<sub>2</sub>.

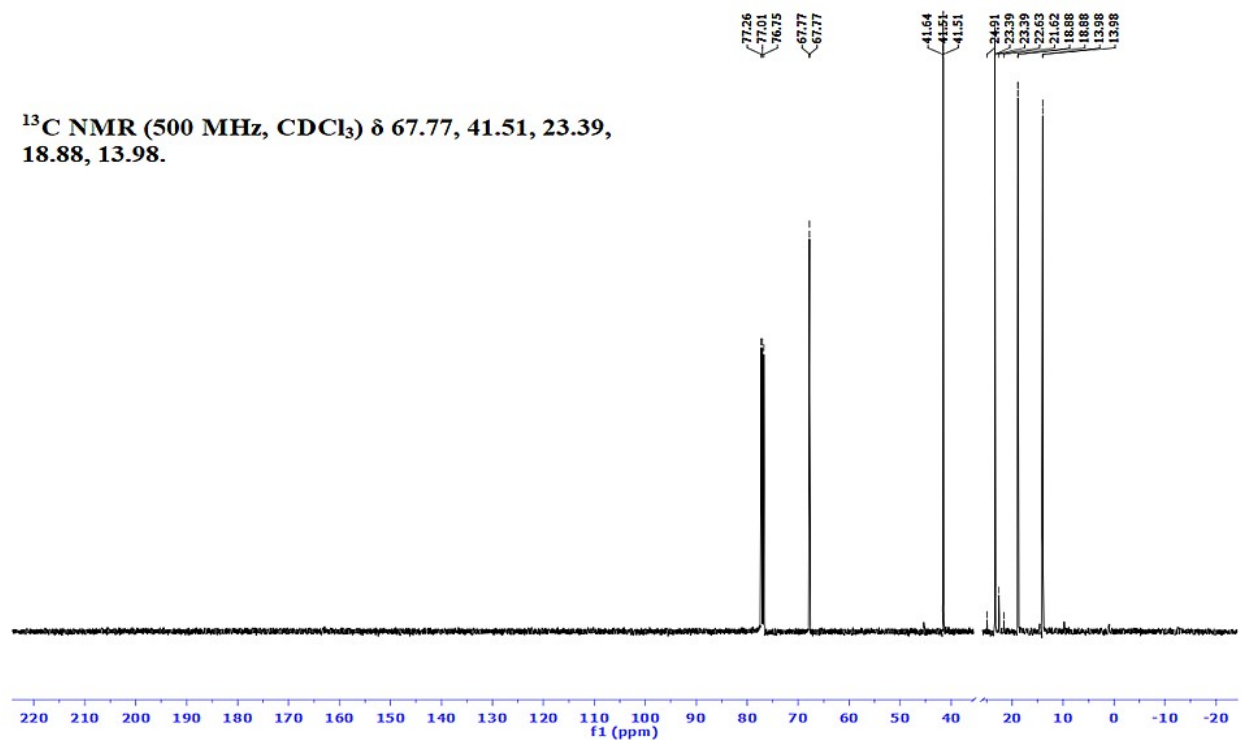

Fig. S9b. <sup>13</sup>C NMR Spectrum of the 2-Pentanol using Pd@SiO<sub>2</sub>.

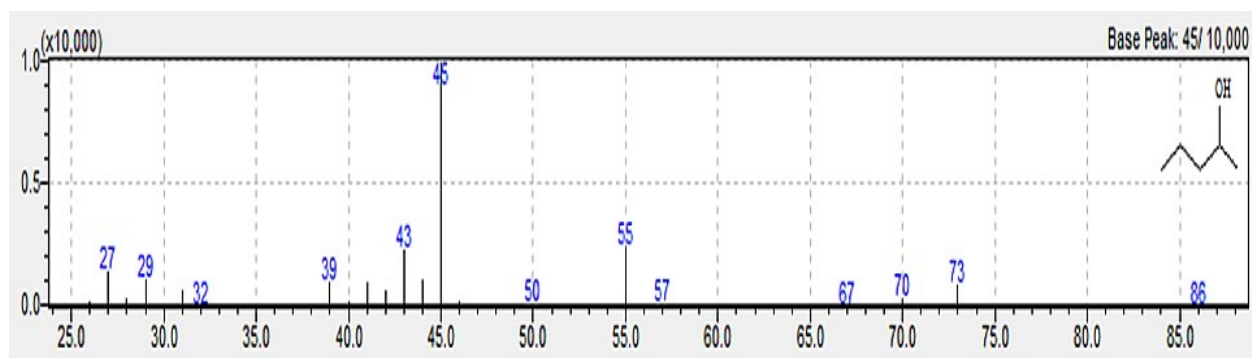

**Fig. S10.** Product chromatogram of the GC-MS analysis obtained for the hydrogenation of 2-Pentanone at 80 °C.

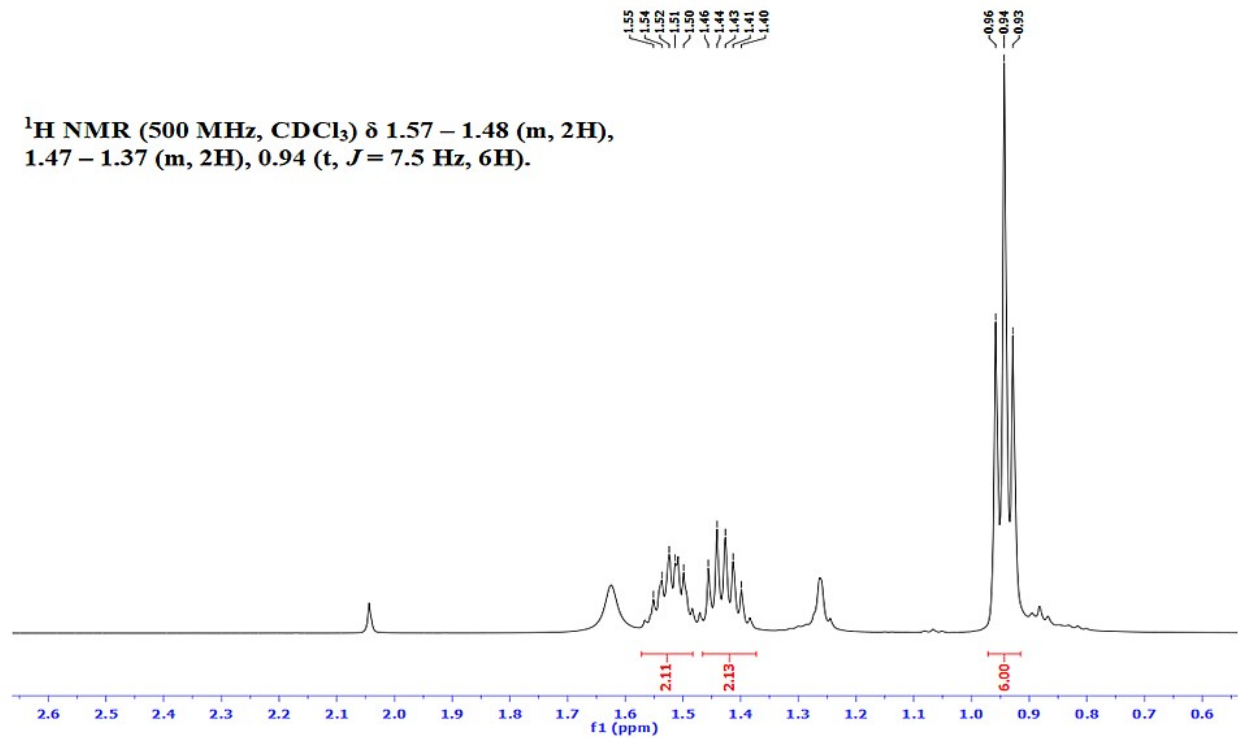

**Fig. S11a.** <sup>1</sup>H NMR Spectrum of the generated 3-Pentanol using Pd@SiO<sub>2</sub>.

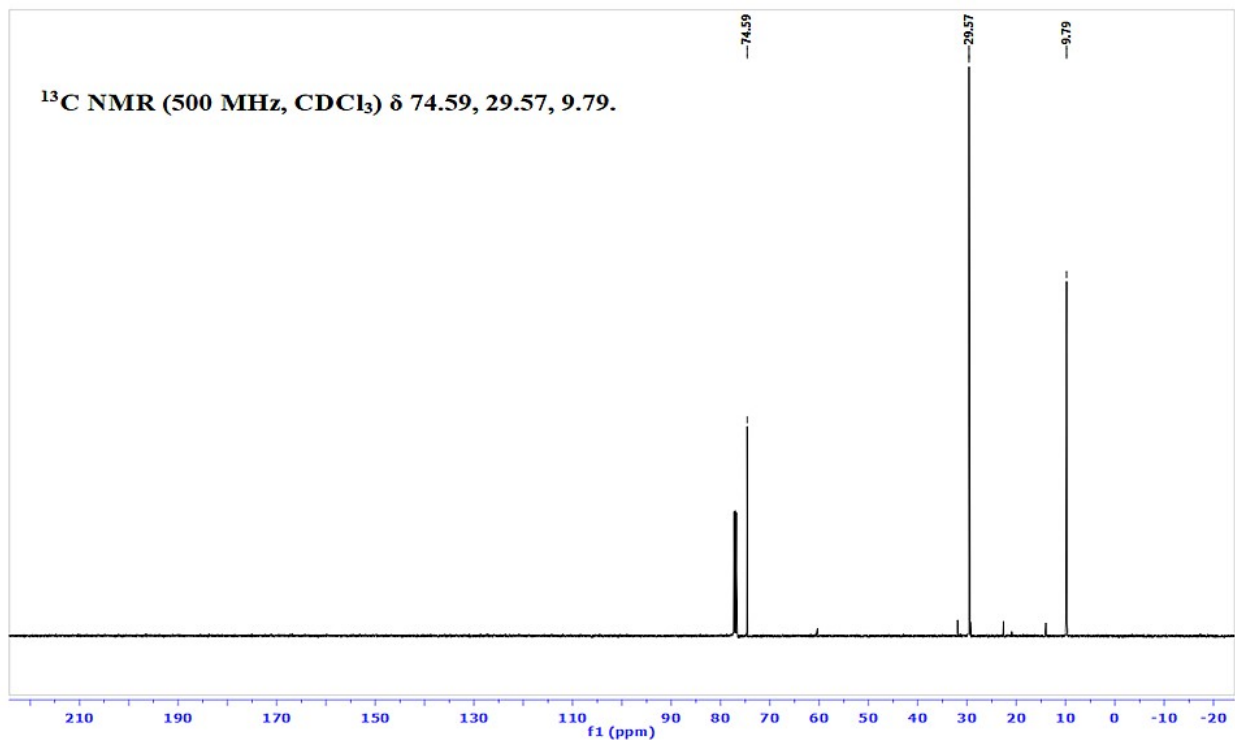

**Fig. S11b.**  $^{13}\text{C}$  NMR Spectrum of the 3-Pentanol using  $\text{Pd@SiO}_2$ .

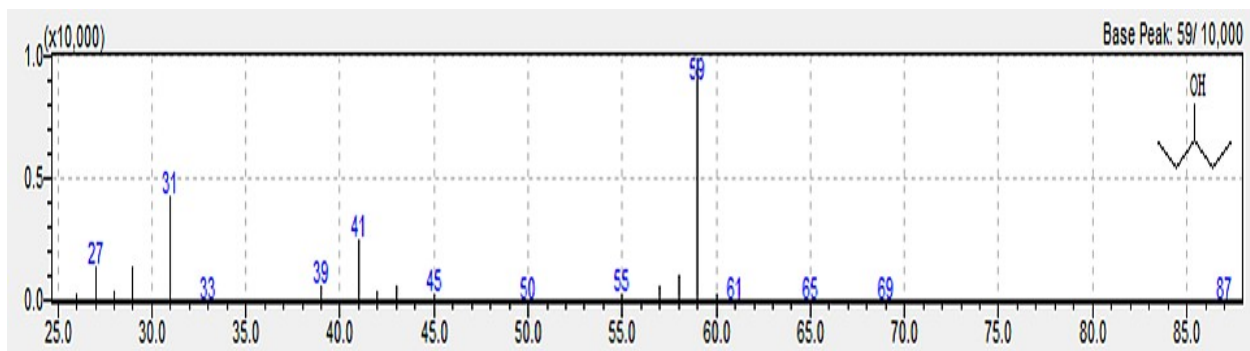

**Fig. S12.** Product chromatogram of the GC-MS analysis obtained for the hydrogenation of 3-Pentanone at  $80\text{ }^\circ\text{C}$ .

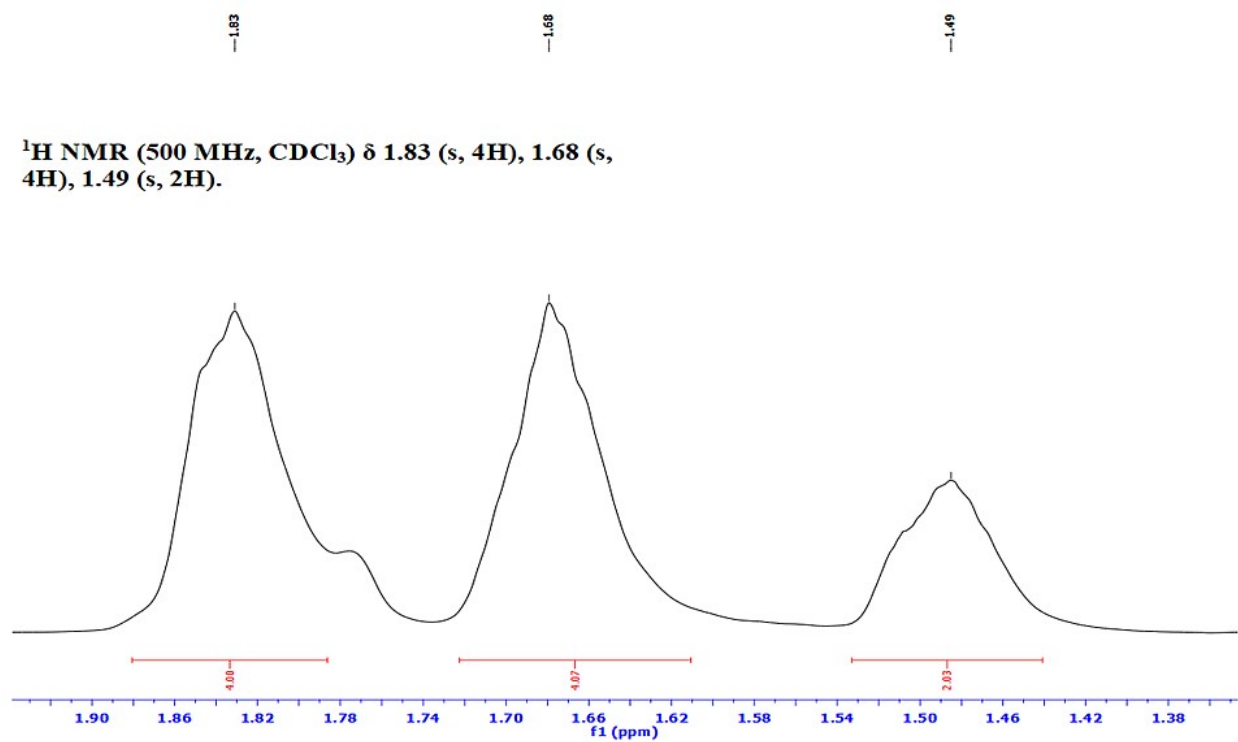

**Fig. S13a.** <sup>1</sup>H NMR Spectrum of the generated cyclohexanol using Pd@SiO<sub>2</sub>.

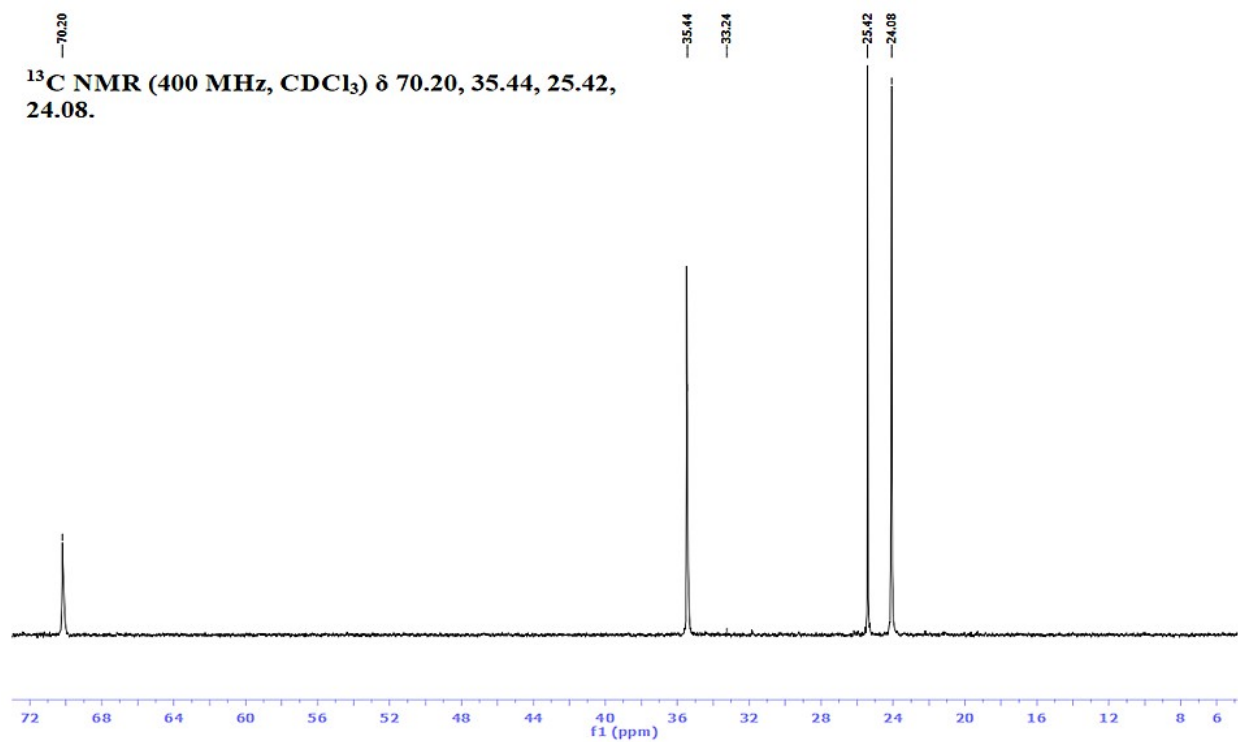

**Fig. S13b.** <sup>13</sup>C NMR Spectrum of the generated cyclohexanol using Pd@SiO<sub>2</sub>.

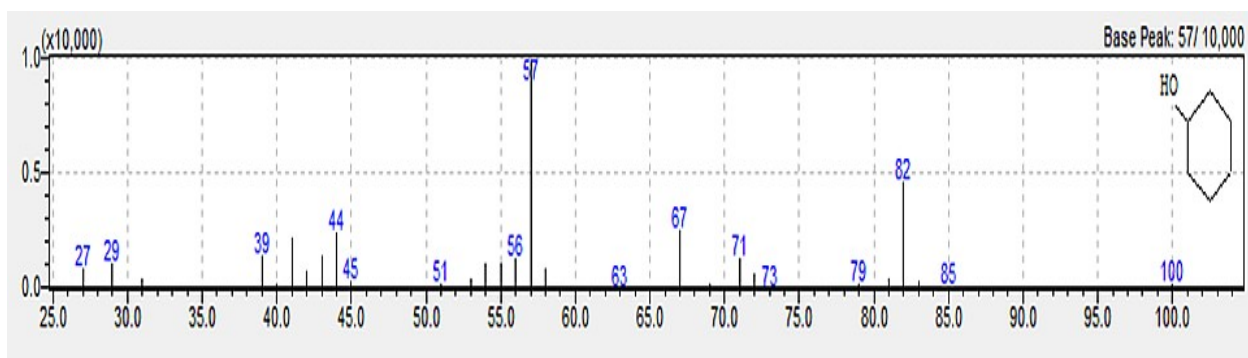

**Fig. S14.** Product chromatogram of the GC-MS analysis obtained for the hydrogenation of 3-cyclohexanone at 80 °C.

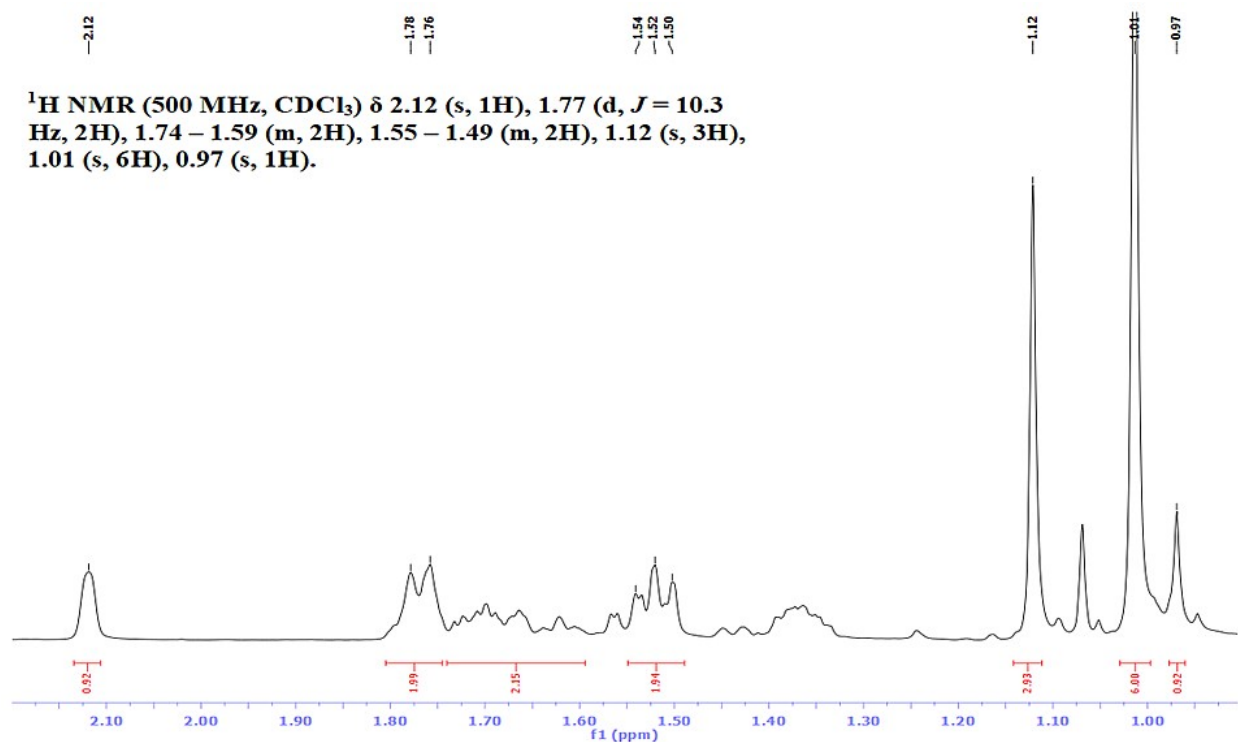

**Fig. S15a.** <sup>1</sup>H NMR Spectrum of the generated fenchol using Pd@SiO<sub>2</sub>.

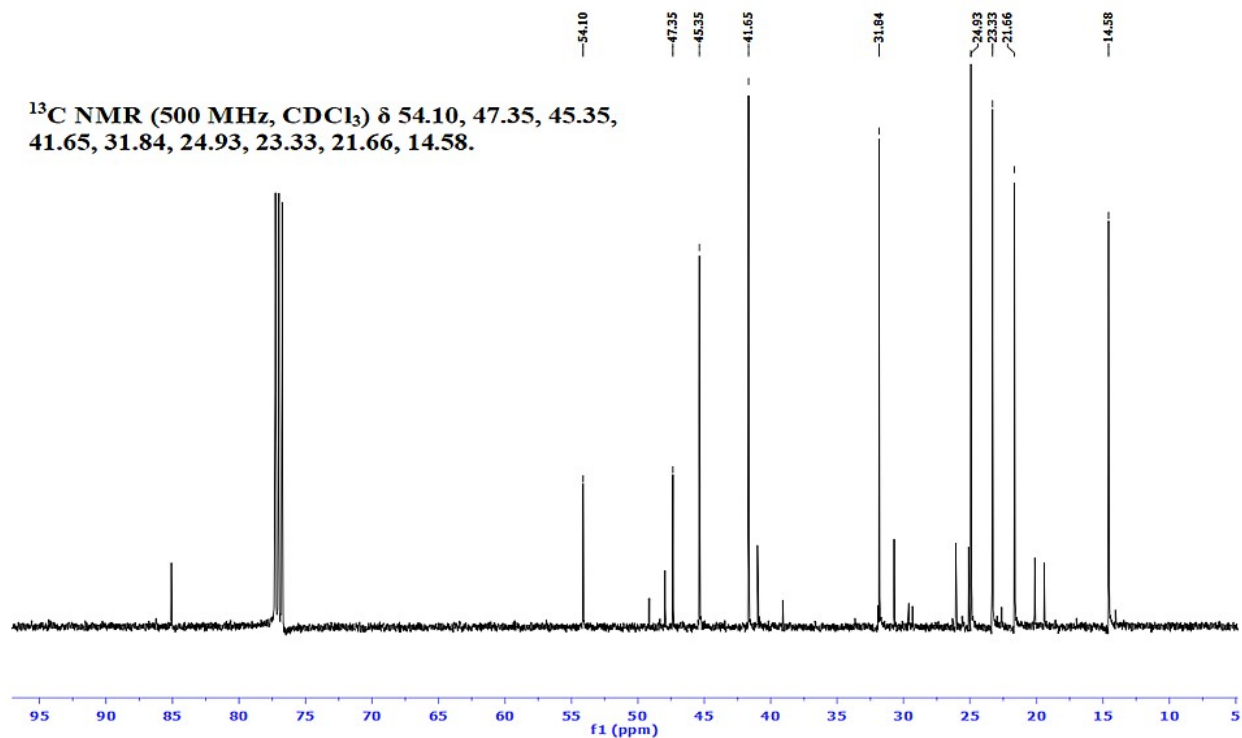

**Fig. S15b.**  $^{13}\text{C}$  NMR Spectrum of the generated fenchol using  $\text{Pd@SiO}_2$ .

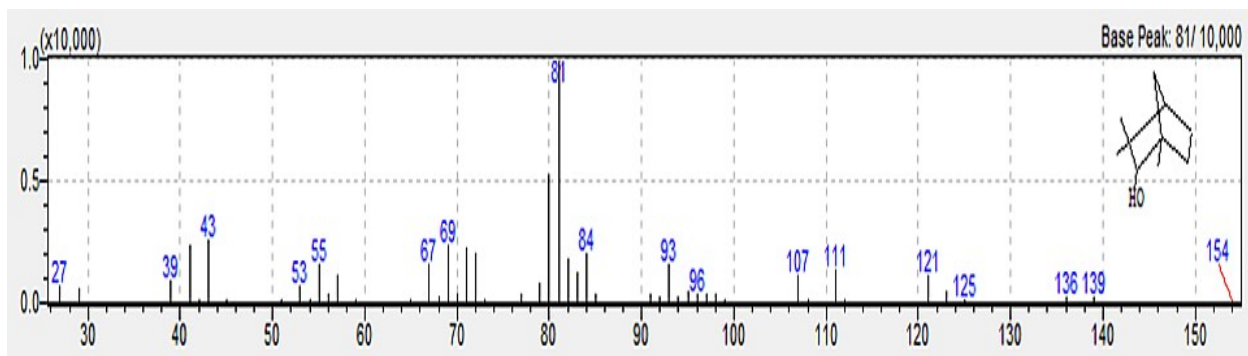

**Fig. S16.** Product chromatogram of the GC-MS analysis obtained for the hydrogenation of 3-Fenphone at 80 °C.



## References

- 1 A. Balouch, A. Ali Umar, A. A. Shah, M. Mat Salleh and M. Oyama, *ACS Appl. Mater. Interfaces*, 2013, **5**, 9843–9849.
- 2 M. T. Shah, A. Balouch, K. Rajar, Sirajuddin, I. A. Brohi and A. A. Umar, *ACS Appl. Mater. Interfaces*, 2015, **7**, 6480–6489.
- 3 D. C. Costa, J. F. Bengoa, S. G. Marchetti and V. Vetere, *Catal. Today*, , DOI:10.1016/j.cattod.2020.09.012.
- 4 S. R. More and G. D. Yadav, *ACS omega*, 2018, **3**, 7124–7132.
- 5 J. Y. Kim, W. K. Shin, A. K. Jaladi and D. K. An, *Tetrahedron*, 2018, **74**, 4236–4241.
- 6 X. B. Zhang, W. N. Lu, J. L. Wang, B. H. Liao, Y. H. Qin, Y. J. Zhang, B. Zhang and S. A. Xin, *Catal. Commun.*, 2019, **119**, 124–128.
